# Supplementary material for: MyFishCheck: A Model to Assess Fish Welfare in Aquaculture
Source: MDPI journal article supplement (doi:10.3390/ani11010145), 2021-01-11
Supplement: s1 [file s1]

Archive with 4 entries (4 files):
- animals-1035051-S1.pdf
- animals-1035051-S2.pdf
- animals-1035051-S3.pdf
- animals-1035051-S4.xlsx
