# Supplementary material for: MyFishCheck: A Model to Assess Fish Welfare in Aquaculture
Source: MDPI journal article supplement (doi:10.3390/ani11010145), 2021-01-11
Supplement: s1 [file s1 › animals-1035051-S1.pdf]

# MyFishCheck:

## A model to assess fish welfare in aquaculture

### Supplementary S1: Parameter Selection.

Selection of welfare parameters that are relevant, reliable and applicable. Definition of the five modules of the model with their respective parameters. y = yes, n = no.

| Parameter                            | relevant | practicable | reliable | into model | module |
|--------------------------------------|----------|-------------|----------|------------|--------|
| blood - adrenocorticotrophic hormone | n        | n           | y        | n          |        |
| blood - alanine aminotransferase     | n        | n           | y        | n          |        |
| blood - albumin 1                    | n        | n           | y        | n          |        |
| blood - albumin 2                    | n        | n           | y        | n          |        |
| blood - alkaline phosphatase         | n        | n           | y        | n          |        |
| blood - ammonia                      | y        | n           | y        | n          |        |
| blood - ammonium                     | y        | n           | y        | n          |        |
| blood - aspartate aminotransferase   | n        | n           | y        | n          |        |
| blood - bile acids                   | n        | n           | y        | n          |        |
| blood - calcium                      | n        | n           | y        | n          |        |
| blood - cholesterol                  | n        | n           | y        | n          |        |
| blood - creatine kinase              | n        | n           | y        | n          |        |
| blood - epinephrine                  | y        | n           | y        | n          |        |
| blood - globulin                     | n        | n           | y        | n          |        |
| blood - glucose                      | n        | n           | y        | n          |        |
| blood - hematocrit                   | n        | n           | y        | n          |        |
| blood - lactate dehydrogenase        | y        | n           | y        | n          |        |
| blood - leucocytes                   | y        | n           | y        | n          |        |
| blood - nitrite                      | y        | n           | y        | n          |        |
| blood - norepinephrine               | n        | n           | y        | n          |        |
| blood - pH                           | y        | n           | y        | n          |        |
| blood - potassium                    | n        | n           | y        | n          |        |
| blood - serotonin                    | n        | n           | y        | n          |        |
| blood - telomere length              | n        | n           | y        | n          |        |
| blood - total bilirubin              | n        | n           | y        | n          |        |
| blood - total protein                | n        | n           | y        | n          |        |
| blood - uric acid                    | n        | n           | y        | n          |        |

| Parameter                               | relevant | practicable | reliable | into model      | module |
|-----------------------------------------|----------|-------------|----------|-----------------|--------|
| individual - anal erosion               | y        | y           | y        | y               | FE     |
| individual - anal infection             | y        | y           | y        | as anal fin     |        |
| individual - caudal erosion             | y        | y           | y        | y               | FE     |
| individual - caudal infection           | y        | y           | y        | as caudal fin   |        |
| individual - dorsal erosion             | y        | y           | y        | y               | FE     |
| individual - dorsal infection           | y        | y           | y        | as dorsal fin   |        |
| individual - pectoral asymmetry         | n        | y           | y        | n               |        |
| individual - pectoral erosion           | y        | y           | y        | y               | FE     |
| individual - pectoral infection         | y        | y           | y        | as pectoral fin |        |
| individual - ventral asymmetry          | n        | y           | y        | n               |        |
| individual - ventral erosion            | y        | y           | y        | y               | FE     |
| individual - ventral infection          | y        | y           | y        | as ventral fin  |        |
| individual - bacterial infection        | y        | n           | n        | n               |        |
| individual - body cavity                | y        | y           | y        | y               | FI     |
| individual - body composition           | n        | n           | n        | n               |        |
| individual - body condition factor      | y        | y           | y        | y               | FE     |
| individual - cardiac activity           | y        | n           | n        | n               |        |
| individual - cardiosomatic index        | y        | n           | y        | n               |        |
| individual - cataract                   | y        | y           | y        | y               | FE     |
| individual - exophthalmia               | y        | y           | y        | y               | FE     |
| individual - eye bleeding               | y        | n           | y        | n               |        |
| individual - eye colour                 | n        | n           | n        | n               |        |
| individual - eye injury                 | y        | y           | y        | y               | FE     |
| individual - eye roll reflex            | n        | y           | y        | n               |        |
| individual - gill cover deformation     | y        | y           | y        | y               | FE     |
| individual - gill cover injury          | y        | y           | y        | as gill cover   |        |
| individual - gill lamellae (secondary)  | y        | y           | y        | y               | FI     |
| individual - gill pathogens             | y        | y           | y        | y               | FI     |
| individual - gills (primarily lamellae) | y        | y           | y        | y               | FE     |
| individual - gonadosomatic index        | n        | y           | y        | n               |        |
| individual - growth - otoliths          | n        | n           | n        | n               |        |
| individual - growth - scale             | n        | n           | n        | n               |        |
| individual - heart                      | y        | y           | y        | y               | FI     |
| individual - hepatosomatic Index        | n        | n           | y        | n               |        |
| individual - intestines                 | y        | y           | y        | y               | FI     |
| individual - jaw deformation            | y        | y           | y        | y               | FE     |
| individual - kidney                     | y        | y           | y        | y               | FI     |
| individual - liver                      | y        | y           | y        | y               | FI     |
| individual - max swim speed             | n        | n           | n        | n               |        |

| Parameter                                | relevant | practicable | reliable | into model          | module |
|------------------------------------------|----------|-------------|----------|---------------------|--------|
| individual - metabolic rate              | n        | n           | n        | n                   |        |
| individual - mouth injury                | y        | y           | y        | y                   | FE     |
| individual - mucus pathogens             | y        | y           | y        | y                   | FE     |
| individual - muscles                     | y        | y           | y        | y                   | FI     |
| individual - pre-rigor mortis time       | n        | y           | y        | n                   |        |
| individual - reproductive organs         | y        | y           | y        | y                   | FI     |
| individual - rigor mortis time           | n        | y           | y        | n                   |        |
| individual - scale loss                  | y        | y           | y        | as skin alterations |        |
| individual - skin alterations            | y        | y           | y        | y                   | FE     |
| individual - skin bleeding               | y        | n           | y        | n                   |        |
| individual - skin colour                 | n        | n           | n        | n                   |        |
| individual - skin fungus                 | y        | y           | y        | y                   | FE     |
| individual - skin injury                 | y        | y           | y        | y                   | FE     |
| individual - spinal deformation          | y        | y           | y        | y                   | FE     |
| individual - spleen                      | y        | y           | y        | y                   | FI     |
| individual - spleenosomatic index        | n        | y           | y        | n                   |        |
| individual - swim endurance              | n        | n           | n        | n                   |        |
| individual - tail-grab reflex            | n        | y           | y        | n                   |        |
| individual - vaccination damage          | y        | y           | y        | as body cavity      |        |
| individual - viral infection             | y        | n           | n        | n                   |        |
| individual - viscerosomatic index        | n        | n           | y        | n                   |        |
| organs - corticotropin releasing hormone | n        | n           | n        | n                   |        |
| organs - gill cysts                      | y        | n           | y        | n                   |        |
| organs - gill epithelial sloughing       | y        | n           | y        | n                   |        |
| organs - gill hyperplasia                | y        | n           | y        | n                   |        |
| organs - gill hypertrophy                | y        | n           | y        | n                   |        |
| organs - gill lamellar fusion            | y        | y           | y        | as gills            |        |
| organs - heart cell lysis                | y        | n           | y        | n                   |        |
| organs - heart vacuoles                  | y        | n           | y        | n                   |        |
| organs - heat shock proteins             | n        | n           | n        | n                   |        |
| organs - immediate early genes           | n        | n           | n        | n                   |        |
| organs - liver cell lysis                | y        | n           | y        | n                   |        |
| organs - liver glycogen                  | n        | n           | n        | n                   |        |
| organs - liver vacuoles                  | y        | n           | y        | n                   |        |
| organs - mucus composition               | n        | n           | y        | n                   |        |
| organs - mucus quantity                  | n        | n           | n        | n                   |        |
| organs - muscle pH                       | n        | n           | n        | n                   |        |
| organs - oxydative stress                | y        | n           | n        | n                   |        |
| plant - ambient light cycle              | y        | y           | y        | as ambient light    |        |

| Parameter                               | relevant | practicable | reliable | into model     | module |
|-----------------------------------------|----------|-------------|----------|----------------|--------|
| plant - ambient light intensity         | y        | y           | y        | y              | M      |
| plant - biomass documentation           | y        | y           | y        | y              | M      |
| plant - catching methods                | y        | y           | n        | n              |        |
| plant - cleanliness                     | y        | y           | y        | y              | M      |
| plant - emergency plan                  | y        | y           | y        | y              | M      |
| plant - crowding duration               | y        | y           | n        | n              |        |
| plant - daily check                     | y        | y           | y        | y              | M      |
| plant - disturbances                    | y        | y           | y        | y              | M      |
| plant - FCR documentation               | y        | y           | y        | as biomass doc |        |
| plant - feed contamination              | y        | n           | n        | n              |        |
| plant - feed leftovers                  | y        | y           | y        | as feeding     |        |
| plant - feed macro-nutrient composition | y        | n           | y        | n              |        |
| plant - feed micro-nutrient composition | y        | n           | y        | n              |        |
| plant - feed storage                    | n        | y           | n        | n              |        |
| plant - feed type                       | y        | y           | y        | y              | M      |
| plant - feeding interval                | y        | y           | y        | y              | M      |
| plant - feeding rate                    | y        | y           | y        | as feeding     |        |
| plant - hygiene concept                 | y        | y           | y        | y              | M      |
| plant - mortality documentation         | y        | y           | y        | y              | M      |
| plant - perging duration                | y        | y           | n        | n              |        |
| plant - personnel training              | y        | y           | y        | y              | M      |
| plant - predator protection             | y        | y           | y        | y              | M      |
| plant - slaughter method                | y        | y           | y        | y              | M      |
| plant - sorting interval                | y        | y           | y        | y              | M      |
| plant - sorting methods                 | y        | y           | n        | n              |        |
| plant - stocking density                | y        | y           | y        | y              | M      |
| plant - target value document           | y        | y           | y        | y              | M      |
| plant - treatment journal               | y        | y           | y        | y              | M      |
| plant - vaccination                     | y        | y           | n        | n              |        |
| plasma - corticosterone                 | n        | n           | y        | n              |        |
| plasma - cortisol                       | n        | n           | y        | n              |        |
| plasma - cortisone                      | n        | n           | y        | n              |        |
| plasma - glucose                        | n        | n           | y        | n              |        |
| plasma - lactate                        | y        | n           | y        | n              |        |
| plasma - osmolality                     | y        | n           | y        | n              |        |
| plasma - total cholesterol              | n        | n           | y        | n              |        |
| plasma - total protein                  | n        | n           | y        | n              |        |
| plasma - triglycerides                  | n        | n           | y        | n              |        |
| shoal - aggression                      | y        | y           | y        | y              | FG     |

| Parameter                       | relevant | practicable | reliable | into model    | module |
|---------------------------------|----------|-------------|----------|---------------|--------|
| shoal - air breathing           | y        | y           | y        | y             | FG     |
| shoal - apathy                  | y        | y           | y        | y             | FG     |
| shoal - balance                 | y        | y           | y        | y             | FG     |
| shoal - body colour             | y        | y           | y        | y             | FG     |
| shoal - eye injuries            | y        | y           | y        | y             | FG     |
| shoal - feeding                 | y        | y           | y        | y             | FG     |
| shoal - fin injuries            | y        | y           | y        | y             | FG     |
| shoal - fin position            | y        | y           | y        | y             | FG     |
| shoal - fish life stage         | y        | y           | n        | n             |        |
| shoal - fleeing                 | y        | y           | y        | y             | FG     |
| shoal - fungal infections       | y        | y           | y        | y             | FG     |
| shoal - gill cover deformations | y        | y           | y        | y             | FG     |
| shoal - isolation               | y        | y           | y        | y             | FG     |
| shoal - jaw deformations        | y        | y           | y        | y             | FG     |
| shoal - jumping                 | y        | y           | y        | as scratching |        |
| shoal - mortality rate          | y        | y           | n        | n             |        |
| shoal - orientation             | y        | n           | y        | n             |        |
| shoal - scratching              | y        | y           | y        | y             | FG     |
| shoal - skin injuries           | y        | y           | y        | y             | FG     |
| shoal - space use               | n        | y           | n        | n             |        |
| shoal - spinal deformations     | y        | y           | y        | y             | FG     |
| shoal - startling               | n        | y           | y        | n             |        |
| shoal - submission              | y        | n           | n        | n             |        |
| shoal - surfacing               | y        | y           | y        | y             | FG     |
| shoal - territoriality          | y        | y           | y        | y             | FG     |
| shoal - ventilation rate        | y        | y           | y        | y             | FG     |
| tank - acoustic level           | y        | n           | n        | n             |        |
| tank - cover                    | y        | y           | n        | n             |        |
| tank - enrichment               | n        | y           | n        | n             |        |
| tank - light distribution       | y        | y           | y        | as tank light |        |
| tank - light intensity          | y        | y           | y        | y             | M      |
| tank - visual protection        | n        | y           | y        | n             |        |
| water - alkalinity              | n        | y           | y        | n             |        |
| water - ammonia                 | y        | y           | y        | y             | W      |
| water - ammonium                | y        | y           | y        | y             | W      |
| water - BSB                     | n        | n           | n        | n             |        |
| water - carboante hardness      | y        | y           | y        | y             | W      |
| water - conductivity            | y        | y           | y        | y             | W      |
| water - corticosterone          | n        | n           | y        | n             |        |

| Parameter                       | relevant | practicable | reliable | into model | module |
|---------------------------------|----------|-------------|----------|------------|--------|
| water - cortisol                | n        | n           | y        | n          |        |
| water - cortisone               | n        | n           | y        | n          |        |
| water - CSB                     | n        | y           | y        | n          |        |
| water - disolved carbon dioxide | y        | y           | y        | y          | W      |
| water - disolved nitrogen       | n        | y           | y        | n          |        |
| water - disolved oxygen         | y        | y           | y        | y          | W      |
| water - exchange rate           | n        | y           | y        | n          |        |
| water - light absorption        | n        | n           | y        | n          |        |
| water - nitrate                 | y        | y           | y        | y          | W      |
| water - nitrite                 | y        | y           | y        | y          | W      |
| water - oxygen saturation       | y        | y           | y        | y          | W      |
| water - oxygen                  | y        | y           | y        | y          | W      |
| water - pH                      | y        | y           | y        | y          | W      |
| water - phosphate               | n        | y           | y        | n          |        |
| water - salinity                | n        | y           | y        | n          |        |
| water - sulfate                 | n        | y           | y        | n          |        |
| water - temperature             | y        | y           | y        | y          | W      |
| water - total gas pressure      | y        | y           | y        | y          | W      |
| water - total suspended solids  | n        | n           | y        | n          |        |
| water - turbidity               | n        | n           | y        | n          |        |
| water - velocity                | y        | y           | y        | y          | W      |
