# Supplementary material for: MyFishCheck: A Model to Assess Fish Welfare in Aquaculture
Source: MDPI journal article supplement (doi:10.3390/ani11010145), 2021-01-11
Supplement: s1 [file s1 › animals-1035051-S3.pdf]

# MyFishCheck:

## A model to assess fish welfare in aquaculture

### Supplementary S3: Calculation Example.

A step-by-step example, using the parameter water temperature, of how the equation of the model is used to calculate the module grade based on the information given in table 2 (for the convenience of the reader the necessary excerpt of Table 2 is shown). The steps are:

1. Locate the measured value in the intervals, e.g. 18 °C for an aquaculture system with pikeperch
2. Obtain the interval's parameter score (PS): -0.33
3. Obtain the interval's score weight (SW): 2.33
4. Obtain the parameter's parameter weight (PW): 4
5. Obtain the corresponding score weight exponent (SWE): 1.7
6. Obtain the corresponding parameter weight exponent (PWE): 1.7
7. Obtain the product for this parameter:  $-0.33 \times 2.33^{1.7} \times 4^{1.7} = -14.67$
8. Repeat 1-6 with all used parameters of the module and add up all the products of used parameters
9. Divided by the product of **the used** score and parameter weights
10. Add 1

| Parameter question                      | Location System Species | Parameter   | Parameter intervals                          | PS      | SW     | PW  | SWE | PWE |   |     |
|-----------------------------------------|-------------------------|-------------|----------------------------------------------|---------|--------|-----|-----|-----|---|-----|
| Temperature of the system water in [°C] | In / Out RAS / FTS RT   | Temperature | Optimum: [10–16]                             | 0       | 1      |     |     |     |   |     |
|                                         |                         |             | Within target range: [6–10) U (16–18]        | -0.33   | 2.33   |     |     |     |   |     |
|                                         |                         |             | Within the tolerance range [4–6) U (18–22]   | -0.66   | 3.66   |     |     |     |   |     |
|                                         |                         |             | Outside the tolerance range: [0–4) U (22–35] | -1      | 5      |     |     |     |   |     |
|                                         | In / Out RAS / FTS PP   |             | Optimum: [20–25]                             | 0       | 1      | 4.4 | 5   | 1.7 | 6 | 1.7 |
|                                         |                         |             | 1 Within target range: [13–20) U (25–28]     | 2 -0.33 | 3 2.33 |     |     |     |   |     |
|                                         |                         |             | Within the tolerance range [8–13) U (28–30]  | -0.66   | 3.66   |     |     |     |   |     |
|                                         |                         |             | Outside the tolerance range [0–8) U (30–40]  | -1      | 5      |     |     |     |   |     |

$$MG_j = \frac{\sum_i \overset{8}{PS_i} * \overset{2}{SW_i^{\overset{5}{SWE_i}}} * \overset{4}{PW_i^{\overset{6}{PWE_i}}}}{\sum_i \overset{9}{SW_i * PW_i}} + 1$$
