# Supplementary material for: MyFishCheck: A Model to Assess Fish Welfare in Aquaculture
Source: MDPI journal article supplement (doi:10.3390/ani11010145), 2021-01-11
Supplement: s1 [file s1 › animals-1035051-S4.xlsx]

## Sheet: farm management
module grade - farm management:		1	indicate the interval	parameter score (PS)	score weight (SW)	parameter weights (PW)	total weight	weighted parameter
parameter	assessment	parameter intervals
personnel training	What is the highest training of the personnel in charge?	0: Apprenticeship or master with work experience	0	0	1	3	6.47301	0
		1: Apprenticeship or master in Aquaculture or "FBA Aquakultur" with work experience
		2: "FBA Aquakultur"
daily check	How are the farm's systems checked?	0: Daily check with appropriate controls	0	0	1	5	15.4258	0
		1: Daily check
		2: System is checked insufficiently
disturbances	Are the fish exposed to external disturbances?	0: No external disturbances	0	0	1	3.5	8.41232	0
		1: Little or slight disturbances
		2: Frequent and / or severe disturbances
plant cleanliness	Is the farm and the used material kept clean?	0: The farm is clean and tidy, working materials are clean and disinfected	0	0	1	3	6.47301	0
		1: The farm is clean, working materials are clean
		2: The farm is chaotic and dirty, working materials dirty
treatment journal	Are chemical measures documented?	0: Medication, extraordinary and routine (disinfection) measures are documented	0	0	1	3	6.47301	0
		1: Medication and extraordinary (disinfection) measures are documented
		2: Medication are documented
target value sheet	Are target values and action plans available?	0: Target value document and action plan are accessible	0	0	1	4	10.5561	0
		1: Target value document and an action plan are known, but not documented
		2: There are no target values or specific action plan applied
emergency plan	Is an emergency plan available?	0: An appropriate emergency plan is available and accessible	0	0	1	4	10.5561	0
		1: An appropriate emergency plan is known, but not documented
		2: No emergency plan is available, or it is not appropriate
hygiene concept	Is a hygiene concept available?	0: An appropriate hygiene concept is available and accessible	0	0	1	4	10.5561	0
		1: An appropriate hygiene concept is applied, but not documented
		2: No emergency hygiene is available, or it is not appropriate
mortality documentation	Are mortalities documented?	0: All mortalities and their cause are documented and deducted from biomass	0	0	1	4	10.5561	0
		1: All mortalities are documented and deducted from the biomass
		2: All mortalities are documented
biomass documentation	Are biomass, stocking density and FCR documented?	0: Biomass/stocking density are documented and recalculated (including the FCR) and sporadically verified with intermediate weighings	0	0	1	3.5	8.41232	0
		1: The biomass and stocking density are documented and sporadically verified with intermediate weighings
		2: The biomass is documented
stocking density	What is the current stocking density?	0: 0 - 30 kg / m3	0	0	1	3	6.47301	0
		1: 30 - 50 kg / m3
		2: 50 - 80 kg / m3
sorting	Is the sorting interval appropriate?	0: The group is homogeneous	0	0	1	3	6.47301	0
		1: The group is slightly heterogeneous, unproblematic
		2: The group is very heterogeneous, problematic
slaughter	Is the slaughter process humane?	0: Crowding: Short / stunning method: effective / killing: fast / no fish shows reflexes	0	0	1	5	15.4258	0
		1: Crowding: Short / stunning method: effective / killing: delayed / no fish shows reflexes
		2: Crowding: long / stunning method: effective / killing: delayed / no fish shows reflexes
feeding interval and rate1	The current feeding interval and rate secures how many points?	0: 5 - 6 points	0	0	1	3.5	8.41232	0
		1: 3-4 points
		2: 0 - 2 points
feed type	Is the feed type and size appropriate?	0: Feed type and pellet size are adapted to the fish	0	0	1	4	10.5561	0
		1: Pellets are too small / big for the animals
		2: Type and size does not match the fish
ambient light2	Is the ambient light appropriate?	0: Light intensity and phases are adjusted	0	0	1	3	6.47301	0
		1: Light intensity or light phases are adjusted
		2: Neither light intensity nor light phases are adjusted
tank light3	Is the light in the husbandry tanks appropriate?	0: Light intensity and light distribution adapted	0	0	1	3	6.47301	0
		1: Light intensity or light distribution adapted
		2: Neither intensity nor light distribution adapted
1	- no feed leftovers - good spatial distribution of the feed in the tank - enthusiastic feeding behavior (neither apathetic nor aggressive) - all fish receive enough food (also subdominant fish) - neither overfed nor emaciated fish - is adjusted weekly
2	- Light intensity: the (room) lighting allows safe working of the personnel and a visual inspection of the fish - Light intensity: the room lighting is soft, the fish behave calmly - Light phases: any transitions from light/dark phases are long/gentle, fish always remain calm
3	- Light intensity: fish are protected from excessive UV radiation (either by shading or sufficient water depth) - Light distribution: no/weak light/dark transitions in the pool, swarm uses the entire water volume

## Sheet: water quality
module grade - water quality:		1	enter the value	parameter interval	parameter score (PS)	score weight (SW)	parameter weights (PW)	total weight	weighted parameter
parameter	assessment	parameter intervals
Temperature	temperature of the system water in [°C]	Optimum: [20 - 25]	22	0	0	1	4	10.5561	0
		Within target range: [13 - 20) ∪ (25 - 28]
		Within the tolerance range [8 - 13) ∪ (28 - 30]
		Outside the tolerance range [0 - 8) ∪ (30 - 40]
Oxygen	Dissolved oxygen (O2) in the system water in [mg/L]	Optimum: [8 - 10]	9	0	0	1	5	15.4258	0
		Within target range: [7 - 8) ∪ (10 - 13]
		Within the tolerance range: [6 - 7) ∪ (13 - 15]
		Outside the tolerance range [2 - 6) ∪ (15 - 30]
Oxygen saturation	Dissolved oxygen (O2) in the system water in [% saturation]	Optimum: [80 - 120]	110.89	0	0	1	5	15.4258	0
		Within target range: [70 - 80) ∪ (120 - 140]
		Within tolerance range: [60 - 70) ∪ (140 - 160]
		Outside the tolerance range [20-60) ∪ (160 - 300]
Ammonium	Total ammonia nitrogen (TAN, NH4-N + NH3-N) of the system water in [mg/L]	Optimum: [0 - 0.5]	0.1	0	0	1	4	10.5561	0
		Within target range: (0.5 - 1.5]
		Within tolerance range: (1.5 - 5]
		Outside the tolerance range: (5 - 20]
Ammonia	Ammonia (NH3-N) of the system water in [mg/L]	Optimum: [0 - 0.01]	0.000717445	0	0	1	5	15.4258	0
		Within target range: (0.01 - 0.02]
		Within tolerance range: (0.02 - 0.1]
		Outside the tolerance range: (0.1 - 2]
Nitrite	Nitrite (NO2-N) of the system water in [mg/L]	Optimum: [0 - 0.05]	0.01	0	0	1	5	15.4258	0
		Within target range: (0.05 - 0.1]
		Within tolerance range: (0.1 - 0.5]
		Outside the tolerance range: (0.5 - 5]
Nitrate	Nitrate (NO3-N) of the system water in [mg/L]	Optimum: [0 - 50]	20	0	0	1	2.5	4.74786	0
		Within target range: (50 - 75]
		Within tolerance range: (75 - 150]
		Outside tolerance range: (150 - 500]
Carbonate hardness	Carbonate hardness of the system water in CaCO3 [mg/L]	Optimum: [40 - 150]	50	0	0	1	3	6.47301	0
		Within target range: [30 - 40) ∪ (150 - 250]
		Within tolerance range: [20 - 30) ∪ (250 - 400]
		Outside tolerance range: [0 - 20) ∪ (400 - 500]
Total suspended solids	TSS of the system water in [mg/L]	Optimum: [0 - 25]	20	0	0	1	2	3.24901	0
		Within target range: (25 - 50]
		Within tolerance range: (50 - 200]
		Outside tolerance range: (200 - 500]
pH	pH of the system water	Optimum: [7 - 7.5]	7.2	0	0	1	4	10.5561	0
		Within target range: [6.5 - 7) ∪ (7.5 - 8]
		Within the tolerance range: [6 - 6.5) ∪ (8 - 8.5]
		Outside the tolerance range: [4 - 6) ∪ (8.5 - 10]
Conductivity	Conductivity of the system water in [µS/cm]	Optimum: [500 - 1000]	900	0	0	1	2	3.24901	0
		Within target range: [300 - 500) ∪ (1000 - 5000]
		Within tolerance range: [200 - 300) ∪ (5000 - 15000]
		Outside tolerance range: [0 - 200) ∪ (15000 - 30000]
Carbon dioxide	Dissolved carbon dioxide (CO2) in the system water in [mg/L]	Optimum: [0 - 5]	4	0	0	1	3.5	8.41232	0
		Within target range: (5 - 20]
		Within tolerance range: (20 - 30]
		Outside the tolerance range: (30 - 100]
Total gas pressure	TGP in the system water in [% saturation]	Optimum: < / = 100	100	0	0	1	4	10.5561	0
		Within target range: (100 - 103]
		Within tolerance range: (103 - 105]
		Outside tolerance range: (105 - 120]
Water velocity	Water velocity in the fish tank in [body lengths/sec]	Optimum: [0.5 - 1]	1	0	0	1	3	6.47301	0
		Within target range: [0.3 - 0.5) ∪ (1 - 2]
		Within tolerance range: [0.2 - 0.3) ∪ (2 - 3]
		Outside the tolerance range: [0 - 0.2) ∪ (3 - 5]

## Sheet: fish group behaviour
module grade - fish group behaviour:		1	indicate the interval	parameter score (PS)	score weight (SW)	parameter weights (PW)	total weight	weighted parameter
parameter	assessment	parameter intervals
aggression	score the fish group according to the intervals	0: No fish shows dominance or aggression	0	0	1	3.5	8.41232	0
		1: Individual fish show dominance behavior
		2: Some fish show dominance behavior
		3: Individual fish show aggression behavior
		4: Some fish show aggressive behavior
		5: Many fish are either dominant or aggressive
territoriality	score the fish group according to the intervals	0: No fish shows territorial behavior	0	0	1	3	6.47301	0
		1: Individual fish show territorial behavior
		2: Some fish show territorial behavior
		3: Individual fish show a territorial monopolization of key areas
		4: Some fish show a territorial monopolization of key areas
		5: Some fish show a territorial monopolization of key areas, a large part of the shoal has no access to these areas
scratching	score the fish group according to the intervals	0: No fish jumps or scratches	0	0	1	4	10.5561	0
		1: Individual fish occasionally jump and/or scratch themselves on surfaces
		2: Some fish occasionally jump and/or scratch themselves on surfaces
		3: Individual fish frequently jump and/or scratch themselves on surfaces
		4: Some fish frequently jump and/or scratch themselves on surfaces
		5: Many fish frequently jump and/or scratch themselves on surfaces
apathy	score the fish group according to the intervals	0: No fish show signs of apathy	0	0	1	5	15.4258	0
		1: Individual fish show apathetic swimming behavior, react normally to stimulation
		2: Some fish show apathetic swimming behavior, react normally to stimulation
		3: Individual fish show apathetic swimming behavior, do not react to stimulation
		4: Some fish show apathetic swimming behavior, do not respond to stimulation
		5: Many fish show apathetic swimming behavior, do not respond to stimulation
isolation	score the fish group according to the intervals	0: All fish are part of a shoal	0	0	1	3.5	8.41232	0
		1: Individual fish stand apart
		2: Some fish stand apart
		3: Individual fish stand apart and / or on the surface
		4: Some fish stand apart and / or on the surface
		5: Many fish stand apart and / or on the surface
surfacing	score the fish group according to the intervals	0: All fish swim normally in the water column	0	0	1	4	10.5561	0
		1: Individual fish are increasingly lying on the bottom
		2: Some fish are lying on the bottom
		3: Individual fish are increasingly swimming on the surface
		4: Some fish swim more and more on the surface
		5: Many fish swim more and more on the surface
air gulping	score the fish group according to the intervals	0: No fish shows air breathing	0	0	1	4	10.5561	0
		1: Individual fish show occasional gasps
		2: Some fish show occasional gasps
		3: Individual fish show frequent gasps
		4: Some fish show constant air gulping
		5: Many fish show constant air gulping
ventilation rate	score the fish group according to the intervals	0: All fish have a normal ventilation rate	0	0	1	4	10.5561	0
		1: Individual fish show an increased ventilation rate
		2: Some fish show increased ventilation rate
		3: Individual fish show a greatly increased or slightly reduced ventilation rate
		4: Some fish show a greatly increased or clearly reduced ventilation rate
		5: Many fish show a greatly increased or clearly reduced ventilation rate
fleeing	score the fish group according to the intervals	0: All fish show normal fleeing when stimulated and calm down quickly	0	0	1	3	6.47301	0
		1: Individual fish show an increased and/or prolonged fleeing behavior
		2: Some fish show an increased and/or prolonged fleeing behavior
		3: Individual fish show no or constant fleeing behavior
		4: Some fish show no or constant fleeing behavior
		5: Many fish show no or constant fleeing behavior
fin position	score the fish group according to the intervals	0: All fish show a normal and calm fin position	0	0	1	3	6.47301	0
		1: Individual fish occasionally have their fins pinched or splayed out
		2: Some fishes occasionally pinch or splay out their fins
		3: Individual fishes have the fins constantly pinched or splayed out
		4: Some fish have the fins constantly pinched or splayed out
		5: Many fishes have the fins constantly pinched or splayed out
balance	score the fish group according to the intervals	0: All fish show a normal balance and orientation	0	0	1	4.5	12.8962	0
		1: Individual fish are sometimes misaligned
		2: Some fish are crooked at times
		3: Individual fish are constantly crooked
		4: Some fish are constantly crooked
		5: Many fish are constantly crooked
body color	score the fish group according to the intervals	0: All the fish show a normal body coloration	0	0	1	3	6.47301	0
		1: Single fish have temporarily a conspicuously bright or dark coloration
		2: Some fish have temporarily a conspicuously bright or dark coloration
		3: Individual fish have constantly striking a bright or dark coloration
		4: Some fish constantly have a noticeable light or dark color
		5: Many fish constantly have a noticeable light or dark color
feeding	score the fish group according to the intervals	0: All fish show normal feeding behavior	0	0	1	3	6.47301	0
		1: Individual fish show a very hungry, hectic eating behavior
		2: Some fish show a very hungry, hectic eating behavior
		3: Individual fish show a starved, aggressive eating behavior
		4: Some fish show a starved, aggressive eating behavior
		5: Many fish show a starved, aggressive eating behavior
jaw deformations	score the fish group according to the intervals	0: No fish has injuries/deformations of the jaw/snout	0	0	1	3	6.47301	0
		1: Individual fish have slight injuries/deformations of the jaw/snout
		2: Some fish have slight injuries/deformations of the jaw/snout
		3: Individual fish have severe injuries/deformations of the jaw/snout
		4: Some fish have severe injuries/deformations of the jaw/snout
		5: Many fish have severe injuries/deformations of the jaw/snout
gill cover deformations	score the fish group according to the intervals	0: No fish has injuries/deformations of the opercula	0	0	1	2	3.24901	0
		1: Individual fish have slight injuries/deformations of the opercula
		2: Some fish have slight injuries/deformations of the opercula
		3: Individual fish have severe injuries/deformations of the opercula
		4: Some fish have severe injuries/deformations of the opercula
		5: Many fish have severe injuries/deformations of the opercula
spinal deformations	score the fish group according to the intervals	0: No fish has injuries/deformations of the spine	0	0	1	3	6.47301	0
		1: Individual fish have a slight injuries/deformations of the spine
		2: Some fish have a slight injuries/deformations of the spine
		3: Individual fish have a severe injuries/deformations of the spine
		4: Some fish have severe injuries/deformations of the spine
		5: Many fish have a severe injuries/deformations of the spine
eye injuries	score the fish group according to the intervals	0: No fish has eye injuries/deformations	0	0	1	3	6.47301	0
		1: Individual fish have slight injuries/deformations to the eyes
		2: Some fish have minor eye injuries/deformations
		3: Individual fish have severe injuries/deformations to the eyes
		4: Some fish have severe eye injuries/deformations
		5: Many fish have severe injuries/deformations to the eyes
skin injuries	score the fish group according to the intervals	0: No fish has injuries/deformations of the skin	0	0	1	4	10.5561	0
		1: Individual fish have slight injuries/deformations of the skin
		2: Some fish have slight injuries/deformations of the skin
		3: Individual fish have severe injuries/deformations of the skin
		4: Some fish have severe injuries/deformations of the skin
		5: Many fish have severe injuries/deformations of the skin
fin injuries	score the fish group according to the intervals	0: No fish has injuries/deformations of the fins	0	0	1	3	6.47301	0
		1: Individual fish have slight injuries/deformations of the fins
		2: Some fish have slight injuries/deformations of the fins
		3: Individual fish have severe injuries/deformations of the fins
		4: Some fish have severe injuries/deformations of the fins
		5: Many fish have severe injuries/deformations of the fins
fungal infections	score the fish group according to the intervals	0: No fish has any fungus	0	0	1	4	10.5561	0
		1: Individual fish have fungal infection of the fins
		2: Some fish have fungal infection of the fins
		3: Individual fish have fungal infection of the fins and the body
		4: Some fish have fungal infection of the fins and the body
		5: Many fish have fungal infection of the fins and the body

## Sheet: fish appearance external
module grade - fish appearance external:		1	indicate the interval	parameter score (PS)	score weight (SW)	parameter weights (PW)	total weight	weighted parameter
parameter	assessment	parameter intervals
standard length	enter the value in [cm]		21
total length	enter the value in [cm]		23
body weight	enter the value in [g]		100
Foulton's K factor	value will be calculated		1.0798
body condition factor	score the calculated value K according to the intervals	0: 0.9 - 1.1	0	0	1	3	6.47301	0
		1: 0.7 - 1.3
		2: > 1.3
		3: < 0.7
spinal deformation	score the fish's appearance accoring to the intervals	0: No indication	0	0	1	3	6.47301	0
		1: Indication of deformation
		2: Clear deformation
		3: Strong deformation
jaw deformation	score the fish's appearance accoring to the intervals	0: No indication	0	0	1	3	6.47301	0
		1: Indication of deformation
		2: Clear deformation
		3: Strong deformation
mouth injury	score the fish's appearance accoring to the intervals	0: No indication	0	0	1	3	6.47301	0
		1: A few small injuries
		2: Several small injuries
		3: One or more large/deep injuries
mucus pathogens	score the fish's appearance accoring to the intervals	0: No parasites detectable	0	0	1	4	10.5561	0
		1: A few parasites
		2: Considerable parasite load
		3: Heavy parasite load
skin alterations	score the fish's appearance accoring to the intervals	0: No indication	0	0	1	3.5	8.41232	0
		1: A few small alterations (tumors, swellings, rashes, bleedings)
		2: Several small alterations (tumors, swellings, rashes, bleedings)
		3: One or more large alterations (tumors, swellings, rashes, bleedings)
skin fungus	score the fish's appearance accoring to the intervals	0: No indication	0	0	1	4	10.5561	0
		1: A few small areas infected
		2: Several small areas infected
		3: One or more large areas infected
skin injury	score the fish's appearance accoring to the intervals	0: No indication	0	0	1	3.5	8.41232	0
		1: A few small injuries or small areas with scale loss
		2: Several small injuries and/or small areas with scale loss
		3: One or more large/deep injuries and/or araes with scale loss
cataract	score the fish's appearance accoring to the intervals	0: Both eyes are clear	0	0	1	3	6.47301	0
		1: One lens shows light clouding
		2: Both lenses show light clouding or one lens strong clouding
		3: Both lenses show strong clouding
eye injury	score the fish's appearance accoring to the intervals	0: No indication	0	0	1	3	6.47301	0
		1: One-sided small injury, not inflamed or healing
		2: One-sided injury or both-sided small injury, slightly inflamed
		3: One-sided severe injury or both-sided injury, inflamed
exophthalmia	score the fish's appearance accoring to the intervals	0: No indication	0	0	1	3	6.47301	0
		1: One-sided slight exophthalmia
		2: Both-sided slight exophthalmia or one-sided exophthalmia
		3: Both-sided exophthalmia
gill cover	score the fish's appearance accoring to the intervals	0: Both-sided: undamaged opercula	0	0	1	2	3.24901	0
		1: One-sided/both-sided: opercula covers min. 2/3 of gill area
		2: One-sided/both-sided: opercula covers min. 1/3 of gill area
		3: One-sided/both-sided: opercula covers less than 1/3 of gill area
gills	score the fish's appearance accoring to the intervals	0: Both-sided: undamaged, red gills	0	0	1	5	15.4258	0
		1: One-sided/both-sided: indications of damaged and/or discolored gill tissue
		2: One-sided/both-sided: several small areas of damaged and/or discolored gill tissue
		3: One-sided/both-sided: extensive areas of damaged and/or discolored gill tissue
pectoral fins	score the fish's appearance accoring to the intervals	0: Undamaged fins	0	0	1	3	6.47301	0
		1: One-sided/both-sided: indications of scar tissue or small/active fin damage
		2: One-sided/both-sided: active fin damage or indications of fungal infections and/or inflammation
		3: Both-sided: extensive scar tissue and/or extensive active fin damage (with/without inflammation) or extensive fungal infection or fin loss
ventral fins	score the fish's appearance accoring to the intervals	0: Undamaged fins	0	0	1	2	3.24901	0
		1: One-sided/both-sided: indications of scar tissue or small/active fin damage
		2: One-sided/both-sided: active fin damage or indications of fungal infections and/or inflammation
		3: Both-sided: extensive scar tissue and/or extensive active fin damage (with/without inflammation) or extensive fungal infection or fin loss
anal fin	score the fish's appearance accoring to the intervals	0: Undamaged fin	0	0	1	2	3.24901	0
		1: Indications of scar tissue or small/active fin damage
		2: Active fin damage or indications of fungal infections and/or inflammation
		3: Extensive scar tissue and/or extensive active fin damage (with or without inflammation) or extensive fungal infection or fin loss
caudal fin	score the fish's appearance accoring to the intervals	0: Undamaged fin	0	0	1	3	6.47301	0
		1: Indications of scar tissue or small/active fin damage
		2: Active fin damage or indications of fungal infections and/or inflammation
		3: Extensive scar tissue and/or extensive active fin damage (with or without inflammation) or extensive fungal infection or fin loss
dorsal fin	score the fish's appearance accoring to the intervals	0: Undamaged fin	0	0	1	3	6.47301	0
		1: Indications of scar tissue or small/active fin damage
		2: Active fin damage or indications of fungal infections and/or inflammation
		3: Extensive scar tissue and/or extensive active fin damage (with or without inflammation) or extensive fungal infection or fin loss

## Sheet: fish appearance internal
module grade - fish appearance internal:		1	indicate the interval	parameter score (PS)	score weight (SW)	parameter weights (PW)	total weight	weighted parameter
parameter	assessment	parameter intervals
heart	score the tissue accoring to the intervals	0: Inconspicuous	0	0	1	3	6.47301	0
		1: Slight discoloration
		2: Discolored and/or slightly enlarged and/or small necrosis and/or small hemorrhages
		3: Severely discolored and/or enlarged and/or necrosis and/or hemorrhages
kidney	score the tissue accoring to the intervals	0: Inconspicuous	0	0	1	3.5	8.41232	0
		1: Slight discoloration
		2: Discolored and/or slightly enlarged and/or small necrosis and/or small hemorrhages
		3: Severely discolored and/or enlarged and/or necrosis and/or hemorrhages
spleen	score the tissue accoring to the intervals	0: Inconspicuous	0	0	1	4	10.5561	0
		1: Slight enlargement
		2: Discolored and/or slightly enlarged and/or small necrosis
		3: Severely discolored and/or enlarged and/or necrosis
liver	score the tissue accoring to the intervals	0: Inconspicuous	0	0	1	4	10.5561	0
		1: Slight discoloration
		2: Discolored and/or slightly enlarged and/or small necrosis
		3: Severely discolored and/or enlarged and/or necrosis
intestines	score the tissue accoring to the intervals	0: Homogeneously filled with smooth food pulp	0	0	1	3	6.47301	0
		1: Unevenly filled with food pulp
		2: Indications of inflammation and change in tissue (discoloring, swelling, tumors)
		3: Inflammation and/or change in tissue (discolored and/or swollen tissue, tumors, hemorrhages, necrosis) or foreign objects
muscles	score the tissue accoring to the intervals	0: Normal	0	0	1	3	6.47301	0
		1: Single small hemorrhages, small vaccination damage
		2: Several small or single extensive hemorrhagesand/or clear vaccination damage
		3: Extensive hemorrhagesand/or necrosis and/or extensive vaccination damage
body cavity	score the tissue accoring to the intervals	0: Inconspicuous	0	0	1	3	6.47301	0
		1: Slight bleeding into the intestine and/or abdominal fat and/or swim bladder wall
		2: Bleeding into the intestine and/or abdominal fat and/or swim bladder wall / slight fluid accumulation
		3: Severe bleeding into the intestine and/or abdominal fat and/or swim bladder wall / fluid accumulation
reproductive organs	score the tissue accoring to the intervals	0: Not developed	0	0	1	2	3.24901	0
		1: Slightly developed/enlarged
		2: Developed/enlarged
		3: Ready to spawn
gill lamellae	score the tissue accoring to the intervals	0: Normal	0	0	1	5	15.4258	0
		1: Lamellae slightly swollen
		2: Lamellae swollen, small hemorrhagesand/or necrosis and/or edema and/or detachment of epithelium
		3: Lamellae severely swollen, hemorrhagesand/or necrosis and/or endema and/or detachment of epithelium, extensive mucus
gill pathogens	score the tissue accoring to the intervals	0: No parasites detectable	0	0	1	4	10.5561	0
		1: A few parasites
		2: Considerable parasite load
		3: Heavy parasite load

## Sheet: Oxygen Computation
Cp	8.11617
P (mbar / atm)	942.149	0.930058
Height above Sea (m)	500
Absolute Oxygen ()	9
water temp (K)	295.15		Pwv/P	0.0280532
water temp (C )	22		thetaP	0.000644
%sat	100
DO (mg/L)	8.11617
Relative Oxygen (%)	110.89
theta	0.00069243
lnPwv	-3.64616
Pwv	0.0260911
chlorinity	0
salinity	0
lnC*	2.16833
C*	8.74371
A	533.864
B	762.489
C	483.751
D	113.615
E	0.0658242
F	0.0443938

## Sheet: Ammoniac Computation
water Temp (C )	22
water Temp K	295.15
K	9.34108
f	0.00717445
pH	7.2
ammoniac (mg/L)	0.000717445
ammonium (mg/L)	0.1

## Sheet: BCF Computation
BCF	1.0798
Body Weight (g)	100
Standard Length (cm)	21
